# Supplementary material for: Suppressing charge carrier recombination in halide perovskite solar cells by ferroelectric polarization
Source: Royal Society of Chemistry journal article supplement (doi:10.1039/d4tc04868g), 2024-12-18
Supplement: d4tc04868g1.pdf [file d4tc04868g1.pdf]

## Supplementary Information for

### Suppressing Charge Carrier Recombination in Halide Perovskite Solar Cells by Ferroelectric Polarization

Hamaneh Zarenezhad<sup>1</sup>, Shervin Daneshvar e Asl<sup>1</sup>, Fatih Uçar<sup>1,2</sup>, Timuçin Balkan<sup>1,2</sup>, Sarp Kaya<sup>1,2,\*</sup>

<sup>1</sup>Koç University TÜPRAŞ Energy Center (KUTEM), 34450 Istanbul, Türkiye

<sup>2</sup>Department of Chemistry, Koç University, 34450 Istanbul, Türkiye

\* Corresponding Author: sarpkaya@ku.edu.tr

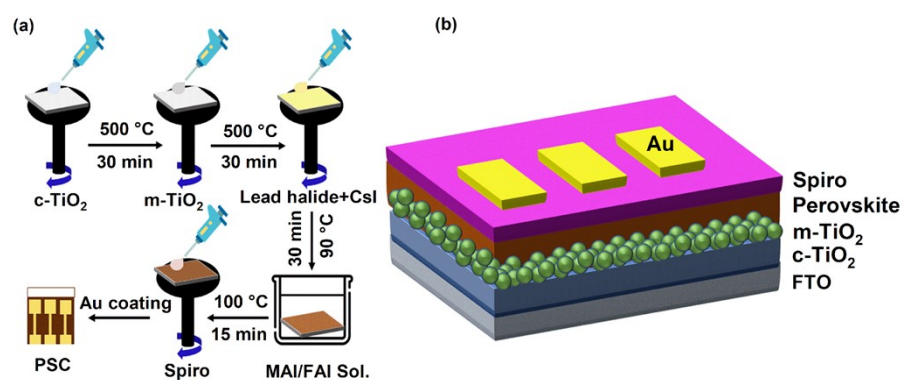

Figure S1. (a) Fabrication method and (b) schematic structure of PSC.

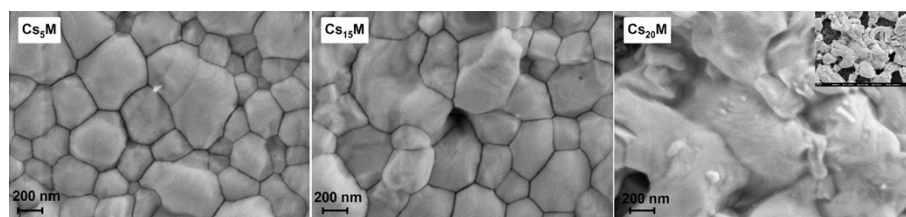

Figure S2. FESEM images of the perovskite layers fabricated with varying amounts of CsI.

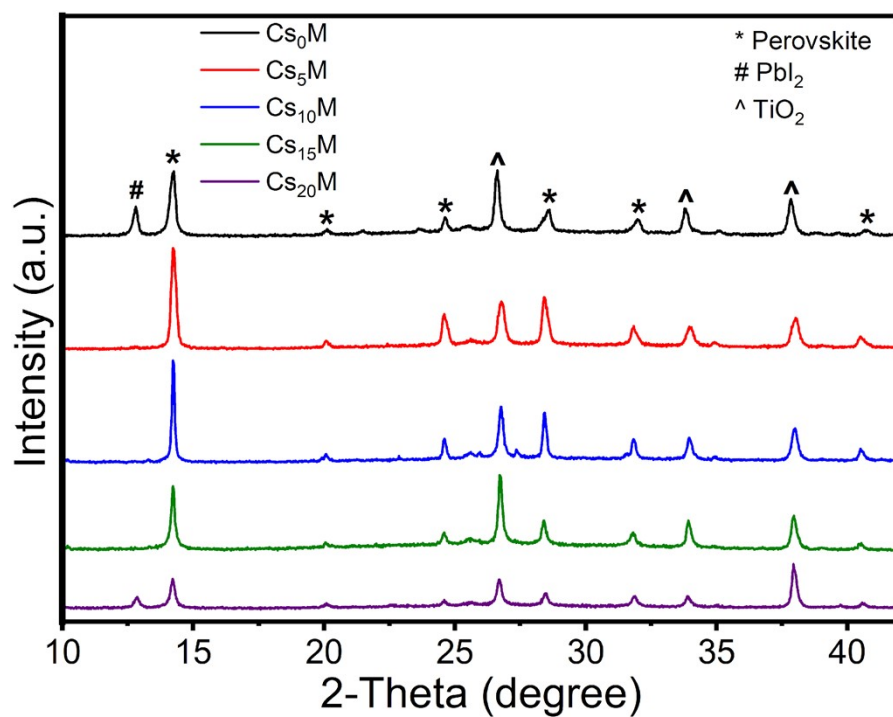

**Figure S3.** XRD patterns of the perovskite layers fabricated with varying amounts of CsI.

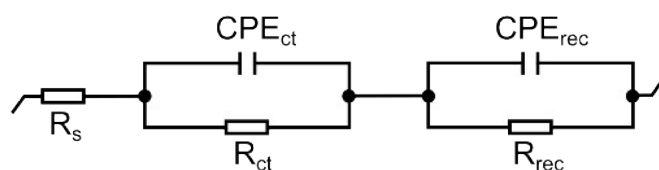

**Figure S4.** An equivalent circuit diagram used to analyze Nyquist plots. CPE represents a constant phase element,  $R_s$ ,  $R_{ct}$ , and  $R_{rec}$  are series, charge transfer, and recombination resistances, respectively.

**Table S1.**  $R_{ct}$  and  $R_{rec}$  data of  $Cs_xM$  PSCs prepared with varying amounts of CsI.

| PSCs       | $R_{ct}$ ( $\Omega$ ) | $R_{rec}$ ( $\Omega$ ) |
|------------|-----------------------|------------------------|
| $Cs_0M$    | 81                    | 768                    |
| $Cs_5M$    | 78                    | 984                    |
| $Cs_{10}M$ | 80                    | 1043                   |
| $Cs_{15}M$ | 84                    | 915                    |
| $Cs_{20}M$ | 82                    | 556                    |

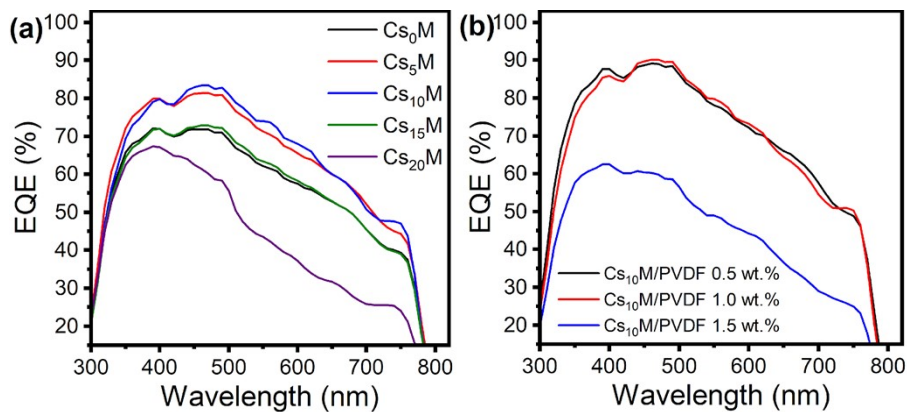

**Figure S5.** External quantum efficiency (EQE) of PSCs with (a) varying CsI and (b) PVDF amounts.

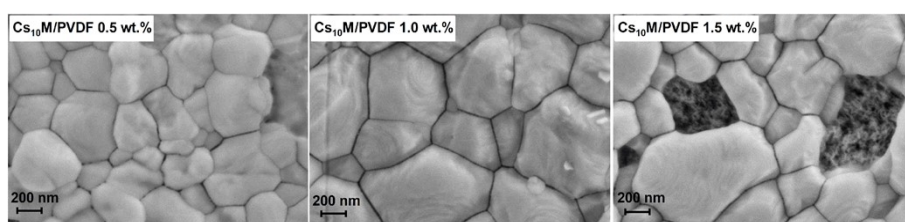

**Figure S6.** FESEM images of  $\text{Cs}_{10}\text{M}$  prepared with different amounts of PVDF.

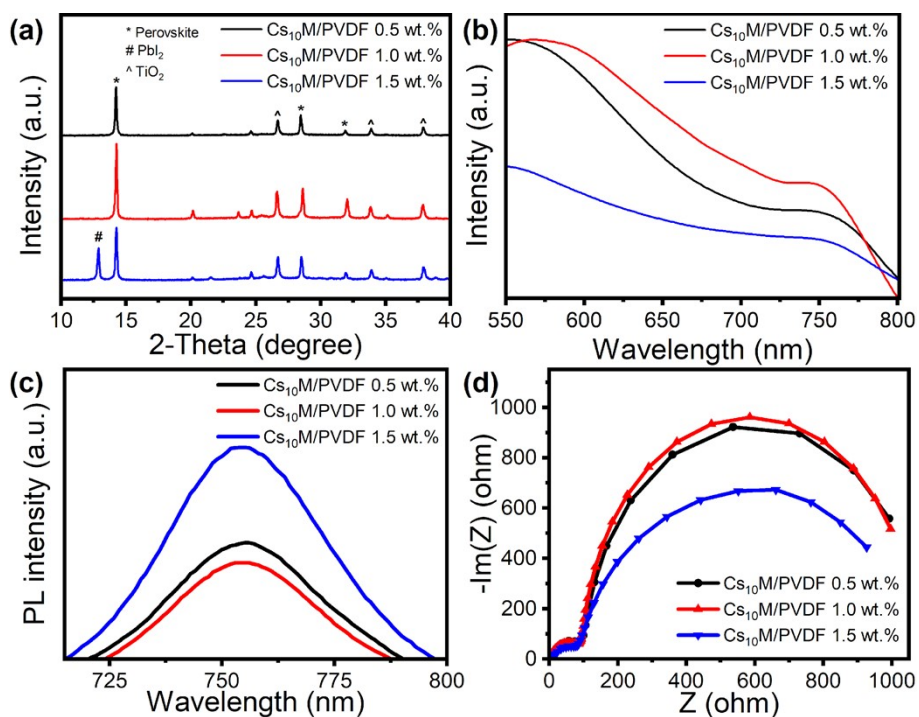

**Figure S7.** XRD patterns of the perovskite layers (a), UV-Vis absorption (b), SS-PL spectra (c), and EIS (d) of different perovskite layers with 10 wt.% CsI and varying amounts of PVDF.

**Table S2.**  $R_{ct}$  and  $R_{rec}$  data of  $Cs_{10}M$  PSCs prepared with varying amounts of PVDF.

| PSCs                     | $R_{ct}$ ( $\Omega$ ) | $R_{rec}$ ( $\Omega$ ) |
|--------------------------|-----------------------|------------------------|
| $Cs_{10}M/0.5$ wt.% PVDF | 82                    | 1194                   |
| $Cs_{10}M/1.0$ wt.% PVDF | 80                    | 1245                   |
| $Cs_{10}M/1.5$ wt.% PVDF | 81                    | 673                    |

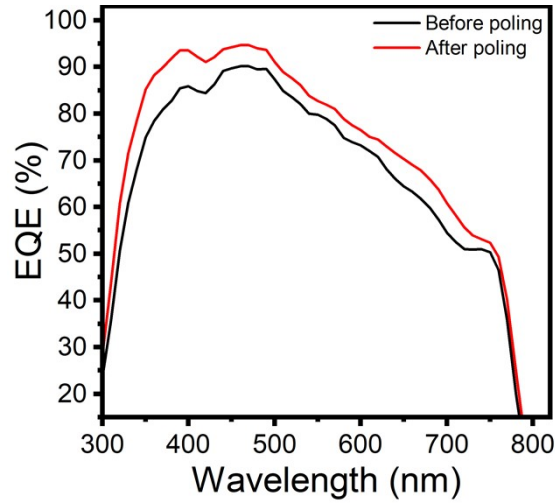

**Figure S8.** EQE of  $Cs_{10}M/1.0$  wt.% PVDF before and after positive poling.

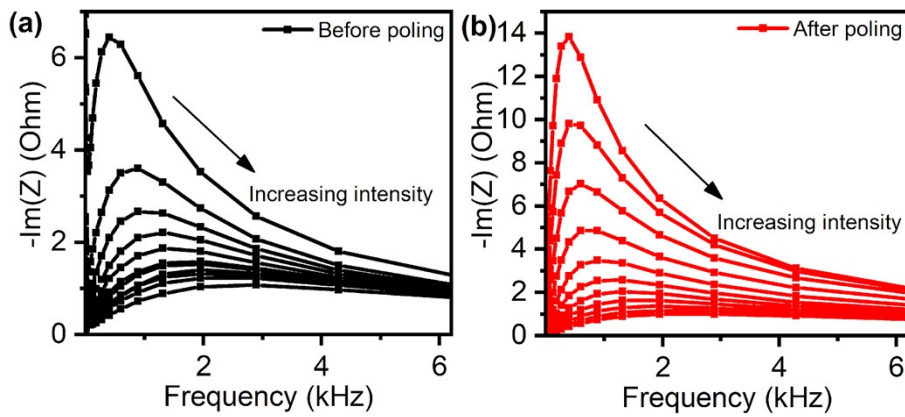

**Figure S9.** Bode-type plots of PSCs (a) before and (b) after poling.

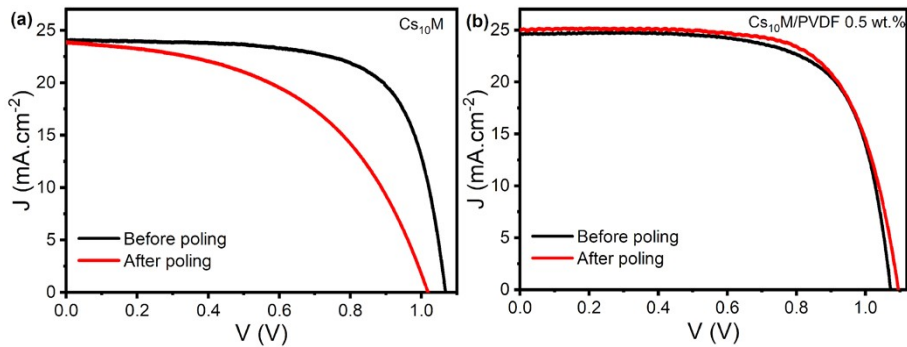

**Figure S10.** J-V plots of  $Cs_{10}M$  PSCs with (a) and without (b) 0.5 wt.% PVDF before and after poling.

**Table S3.** Photovoltaic parameters of Cs<sub>10</sub>M PSCs prepared with and without 0.5 wt.% PVDF. The average values and standard deviations were calculated from 10 devices.

| PSCs                                            | J <sub>sc</sub> (mA.cm <sup>-2</sup> ) | V <sub>oc</sub> (V)   | FF                    | PCE %                 |
|-------------------------------------------------|----------------------------------------|-----------------------|-----------------------|-----------------------|
| Cs <sub>10</sub> M, before poling               | 24.07<br>(23.91 ± 0.26)                | 1.06<br>(1.05 ± 0.02) | 0.7<br>(0.69 ± 0.01)  | 17.9<br>(17.5 ± 0.3)  |
| Cs <sub>10</sub> M, after poling                | 23.81<br>(23.44 ± 0.41)                | 0.99<br>(0.98 ± 0.01) | 0.50<br>(0.49 ± 0.01) | 12.2<br>(11.5 ± 0.4)  |
| Cs <sub>10</sub> M/PVDF 0.5 wt.%, before poling | 24.65<br>(24.43 ± 0.30)                | 1.07<br>(1.06 ± 0.01) | 0.7<br>(0.7 ± 0.01)   | 18.7<br>(18.3 ± 0.2)  |
| Cs <sub>10</sub> M/PVDF 0.5 wt.%, after poling  | 25.01<br>(24.93 ± 0.18)                | 1.09<br>(1.08 ± 0.01) | 0.7<br>(0.69 ± 0.01)  | 19.1<br>(18.94 ± 0.2) |

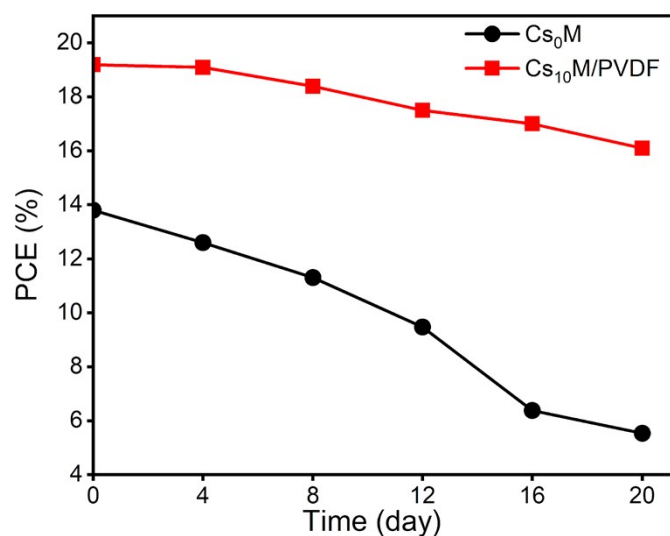

**Figure S11.** Changes in PCEs of PSCs prepared with (red) and without (black) PVDF.
